# Supplementary material for: 共同研究報告 第三会場 近現代史部会 朝鮮戦争期の地域社会における支配と対抗--埼玉県所沢地域の社会運動を中心に (2008年度日本史研究会大会にむけて 大会テーマ 社会統合原理の再検討)
Source: Royal Society of Chemistry journal article supplement (doi:10.1039/d3ra08266k), 2008-09-01
Supplement: d3ra08266k1.pdf [file d3ra08266k1.pdf]

**Electronic Supplementary Information**

**Preparation of high-performance anti-aging polypropylene by modified nano-TiO<sub>2</sub>  
and Calcium sulfate whisker grafted acrylonitrile composite PP**

Shanshan Cong,<sup>a, b</sup> Tianyu Lan,<sup>\*b,c,d</sup> Yazhen Wang,<sup>\*d</sup> Liwu Zu,<sup>d</sup> Shaobo Dong,<sup>d</sup> Zuoyuan Zhang<sup>a</sup>

<sup>a</sup> School of Chemistry and Chemical Engineering, Qiaihar University, Qiaihar, China

<sup>b</sup> College of Materials Science and Engineering, Qiaihar University, Qiaihar, China

<sup>c</sup> Northeast Petroleum University Applied Technology Research Institute, Northeast Petroleum University, Daging, China

<sup>d</sup> College of Materials Science and Engineering, Heilongjiang Province Key Laboratory of Polymeric Composition Material, Qiaihar University, Qiaihar

\*Corresponding author: Tianyu Lan

College of Materials Science and Engineering, Qiaihar University, Qiaihar, China

E-mail: 409222743@qq.com

Yazhen Wang

College of Materials Science and Engineering, Qiaihar University, Qiaihar, China

E-mail: wyz6166@nefu.edu.cn

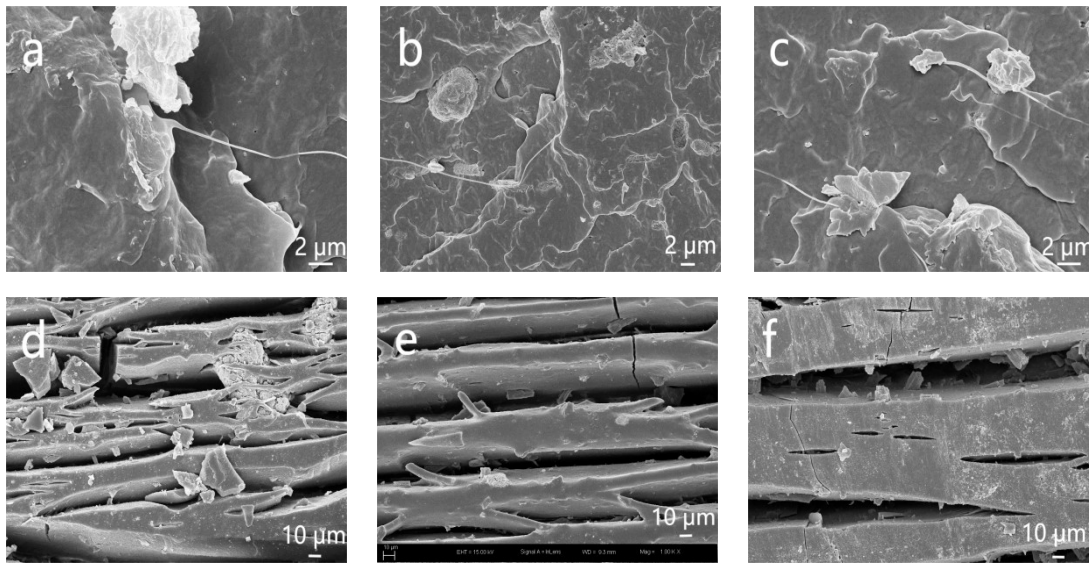

Fig.S1 SEM analysis plots of TiO<sub>2</sub>/PP (a、 d), KH570-TiO<sub>2</sub>/PP,(b、 e) and TiO<sub>2</sub>-PAN/PP(c、 f) before and after 1000h of aging.

As shown in Figure S1, obvious aggregates can be seen on the SEM image of TiO<sub>2</sub>/PP composite material, indicating that TiO<sub>2</sub> is not uniformly dispersed in the PP matrix and the surface shows a trend of multi-layer distribution, indicating poor compatibility between TiO<sub>2</sub> and PP(Figure S1a). Through the aging SEM image, we can see that not only many cracks appear, but also obvious aggregates, and the fiber part breaks, which proves that the compatibility of TiO<sub>2</sub> and PP is not good, resulting in poor anti-aging performance(Figure S1d).The multi-layered distribution at the interface of the modified KH570-TiO<sub>2</sub>/PP composite material is reduced, and although there are still agglomerates, the volume of the agglomerates decreases and the dispersibility improves(Figure S1b).The modified KH570-TiO<sub>2</sub>/PP composite showed better anti-aging properties compared with the TiO<sub>2</sub>/PP composite, which was due to the modification of the coupling agent, so that TiO<sub>2</sub> could be more evenly dispersed in the PP matrix(Figure S1e).The dispersion of TiO<sub>2</sub>-PAN/PP composite obtained after grafting acrylonitrile has not been effectively improved, which is due to the incompatibility between acrylonitrile and PP itself. The coupling agent coating provides the active site for acrylonitrile grafting, but the ungrafted acrylonitrile still

has polarity and is difficult to be compatible with PP, which is manifested in the dispersed aggregates in the PP matrix, which will lead to the reduction of anti-aging performance(Figure S1c).Some agglomerates can still be observed on the surface of TiO<sub>2</sub>-PAN/PP composites after 1000h of aging, which is caused by the poor compatibility between PAN and PP(Figure S1f). This phenomenon will also cause the fracture of the surface. Although the anti-aging performance of grafted acrylonitrile is significantly improved, the mechanical properties obtained still fail to meet the actual requirements of high performance-polypropylene.
